# Supplementary material for: A Secreted RNA Binding Protein Forms RNA-Stabilizing Granules in the Honeybee Royal Jelly
Source: PubMed Central journal article supplement (PMC6509358; doi:10.1016/j.molcel.2019.03.010), 2019-05-02
Supplement: mmc5.pdf [file mmc5.pdf]

**18 nt ss-oligo sequence (5' → 3')**

UGUGUUUAUAGCGGAUUU

**20 nt ss-oligo sequence (5' → 3')**

UGUGUUUAUAGCGGAUUUUG

**21 nt ss-oligo sequence (5' → 3')**

UGUGUUUAUAGCGGAUUUUGA

**22 nt ss- and ds-oligo sequence (5' → 3')**

TCATATGGGCTCACTGTTACTA

**23 nt ss-oligo sequence (5' → 3')**

AGGUAAGAUGUUGGUAUAGCUGA

**50nt ss- and ds-oligo sequence (5' → 3')**

ACGCUUCUAACUUC AAGAUUUUACACAAUCAUAUGGGCUCACUGUUACUA

**dsRNA-*unc-22* DNA template sequence (excluding the T7 promoters; 5' → 3')**

AGACCGGCAGATCTGATATCATCGATGAATTCGAGCTCCACCGGGTGGCGGCCGCTCTAGAACTAGTGGATCC  
ACCGGTTCCATGGCTAGCCACGTGACGCGTGATCCCCGGGCTGCAGGAATTCGATTACCAACGGTTTTGGAA  
GGGACAAACATTCCGTTGAGGTCATTGTGCTTGGAAAACCATTCCTAGCCCCATTGGGACCTTTGGAAAGTGTGCA  
ATGTCTACGAAGATCGCGCAGATTTGGAGTGGAAAGTACCAGAAGATGACGGAGGTGCTCCAATTGATCATTAT  
GAAATCGAAAAGATGGATTTGGCAACTGGAAGATGGGTCCCATGTGGAAGAAGTGAAACAACAAAGACCACAGT  
TCCAAATCTTCAACCCGGGCACGAATACAAATTCGCTGTCAGAGCTGTGAACAAGGAGGGAGAATCCGATCCAC  
TCGCAACCAACACCGCAATCCTCGCCAAGAACCATAACGAGGTTCCAGGAAAAGTTGACAAGCCGGAATTGGTG  
GACTGGGATAAGGATCATGTTGATCTTGCATGGAATGCTCCAGACGATGGTGGTGCACCAATTGAAGCTTTCGT  
CATTGAGAAGAAGGATAAGAATGGACGATGGGAAGAAGCTCTCGTTGTTCCAGGAGATCAGAAAACAGCAACTG  
TTCCAAATCTTAAGGAGGGAGAAGAATATCAATTCAGAATTTCTGCTCGTAACAAGGCTGGAAC TGGAGATCCT  
TCTGATCCTTCTGATCGTGTGTTGTTGCGAAGCCAAGAAACCTTGCTCCAAGAATTCATCGTGAAGATCTTCTGA  
TACAACTGTCAAGGTCGGAGCCACTCTCAAGTTCATTGTTCATATTGATGGTGAGCCAGCACCAGATGTAACAT  
GGTCATTCAATGGAAGGAAATCGGAGAGAGCAAGGCTCAAATGAAAAATGAGCCATACATCTCGAGATTTGCT  
TTGCCAAAGGCACTTCGTAAGCAAAGTGGAAAATATACCATCACTGCAACCAACATTAATGGAAC T GACAGTGT  
CACTATCAATATCAAGGTAAAAAGCAAGCCAACGAAACCAAAGGGACCAATCGAGGTAAC TGATGCTTTCGAAG  
ATCGTGCAACTCTTGACTGGAAACCACCAGAGGATGACGGAGGAGGCCAATTGAGTTCATGAAATGAAAAG  
ATGAACACCAAGGACGGAATCTGGGTTCATGTGGACGTAGTGGAGATACCCACTTCACAGTCGATTCACTCAA  
CAAGGGAGATCATTAATCAAGCTTATCGATACCGTCGACCTCGAGGGGGGGCCCGGTACCCAATTTCG

**Supplementary Table 2B: List of primers in this study**

| Primers & purpose (5' → 3')                                                                                                                                                     | Amplified sequence                            | Product size (bp) |
|---------------------------------------------------------------------------------------------------------------------------------------------------------------------------------|-----------------------------------------------|-------------------|
| DsRNA-Fluc DNA template synthesis & RT-PCR detection:<br><br>Forward:<br>CTAATACGACTCACTATAGGGCGAaaaacgcttccatcttcca<br>Reverse:<br>CTAATACGACTCACTATAGGGCGatccacaaacacaactcctc | AB261988                                      | 617               |
| DsRNA- <i>unc-22</i> DNA template synthesis:<br><br>Forward:<br>CTAATACGACTCACTATAGGGagaccggca<br>Reverse:<br>CTAATACGACTCACTATAGGGcgaattgggt                                   | Unc-22 RNAi clone ZK617.1 (Source Bioscience) | 1365              |

Comment: T7 RNA-pol promoter sequence is highlighted in capital letters
